# Supplementary material for: State Legislator Social Media Posts About the 988 Suicide and Crisis Lifeline
Source: PubMed Central journal article supplement (PMC10603493; doi:10.1001/jamanetworkopen.2023.39845), 2023-10-26
Supplement: jamanetwopen-e2339845-s001.pdf [file jamanetwopen-e2339845-s001.pdf]

## Supplemental Online Content

Purtle J, Soltero M, Crane ME, McSorley AMM, Knapp M, Drapeau CW. State legislator social media posts about the 988 Suicide and Crisis Lifeline. *JAMA Netw Open*. 2023;6(10):e2339845. doi:10.1001/jamanetworkopen.2023.39845

### **eMethods.**

This supplemental material has been provided by the authors to give readers additional information about their work.

**eMethods.**

**Search String Used:** ("988" OR "9-8-8") AND ("lifeline" OR "hotline" OR "suicide" OR "mental health" OR "crisis" OR "substance" OR "opioid")

**Coding Instrument:**

Q1 Coder name

(1)

(4)

(2)

(3)

---

Q2 Quorum ID (used to link to Quorum with information on post date, state, and political party).

\_\_\_\_\_

---

Q8 Is the post a Retweet (content begins "RT")?

Yes (1)

No (2)

---

Q9 **General news:** Is the content a general news announcement about the launch of 988, **and does NOT** encourage help seeking, include news about legislative/government action, or funding/capacity challenges?

Yes (1)

No (2)

**Q10 Encouraging self-help seeking:** Does the content include a call to action for people experiencing suicidality, mental distress, and/or substance use problems to call/chat/text 988 for themselves or on behalf of a loved one?

Yes (1)

No (2)

---

**Q11 News about legislative/government action:** Does the content mention of a bill being introduced about 988, a legislative hearing about 988, a government report about 988, or other legislative/government activity about 988?

Yes (1)

No (2)

---

**Q13 Substance use mention:** Does the content mention that 988 can be used for substance use crisis/concerns (i.e., not only suicidality or mental health concerns)?

Yes (1)

No (2)

---

**Q14 Statistics:** Does the content include statistics about suicide, mental health, or substance use?

Yes (1)

No (2)
