# Supplementary material for: State Legislator Social Media Posts About the 988 Suicide and Crisis Lifeline
Source: PubMed Central journal article supplement (PMC10603493; doi:10.1001/jamanetworkopen.2023.39845), 2023-10-26
Supplement: jamanetwopen-e2339845-s002.pdf [file jamanetwopen-e2339845-s002.pdf]

## Data Sharing Statement

Purtle. State Legislator Social Media Posts About the 988 Suicide and Crisis Lifeline. *JAMA Netw Open*. Published online October 26, 2023. doi:10.1001/jamanetworkopen.2023.39845

### Data

**Data available:** Yes

**Data types:** Deidentified participant data **How to access data:** <https://osf.io/mp9nr/> **When available:** With publication

### Supporting Documents

**Document types:** None

### Additional Information

**Who can access the data:** Researchers whose proposed use of the data has been approved

**Types of analyses:** Secondary analysis

**Mechanisms of data availability:** OSF, at <https://osf.io/mp9nr/>
